# Supplementary material
Source: publisher figshare collection journal article supplement (https://acs.figshare.com/ndownloader/files/4392760)
Supplement: Supplementary file 1 [file 4392760]

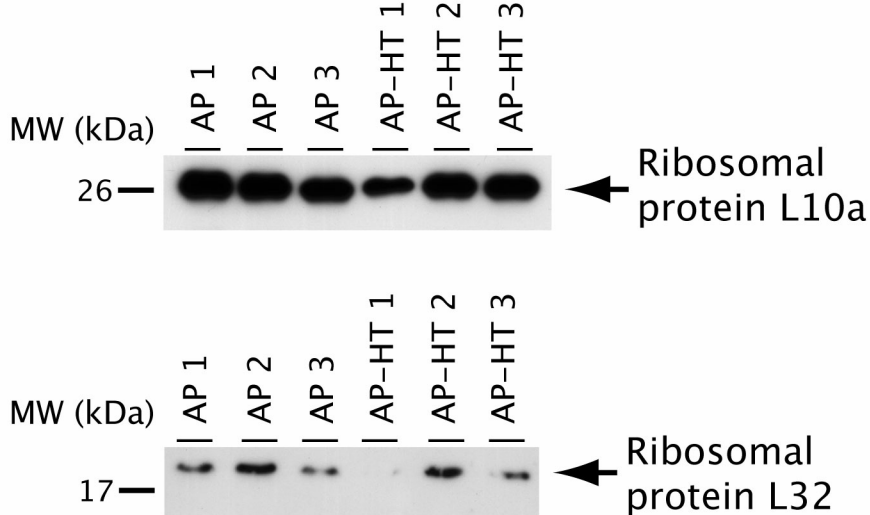

### Supplementary Figure 5:

Ten  $\mu$ g of pancreatic protein extracts were separated by SDS-PAGE on homemade Tris-Glycine gels (12.5% T). Proteins separated by 1-DE were electroblotted onto a nitrocellulose or PVDF membrane. Immunodetection was performed as described in Methods section using an antibody against ribosomal protein L10a and ribosomal protein L32. Membranes were developed with BM Chemiluminescence Blotting Substrate (Roche). MW: molecular weight markers, AP: acute pancreatitis, AP-HT: acute pancreatitis with prior thermal stress.
